# Supplementary material
Source: PubMed Central journal article supplement (PMC7123794)

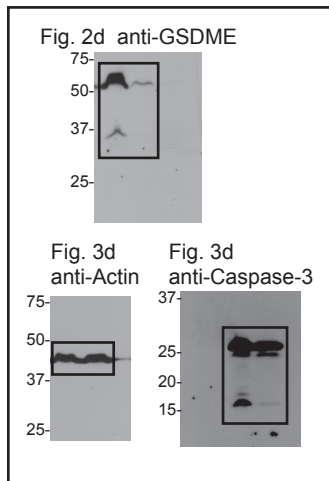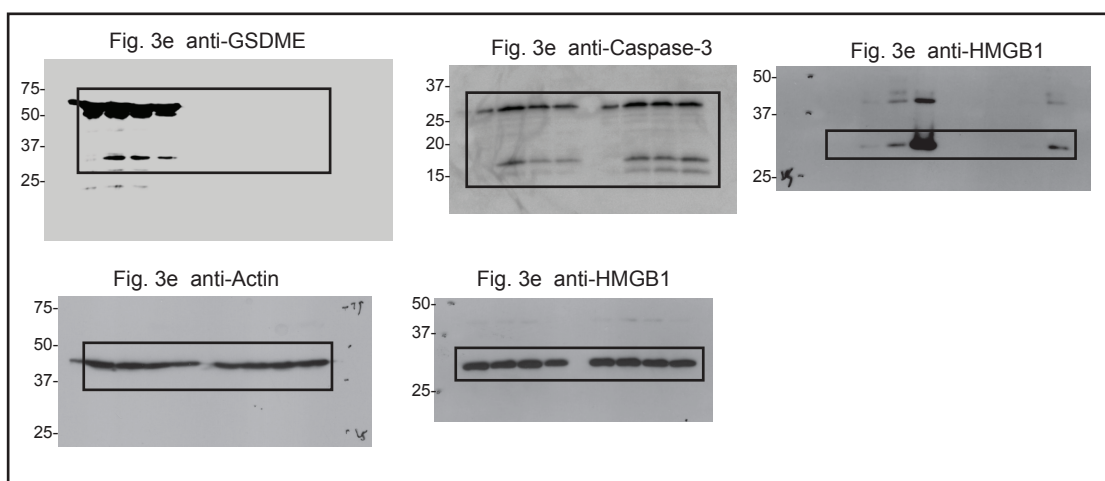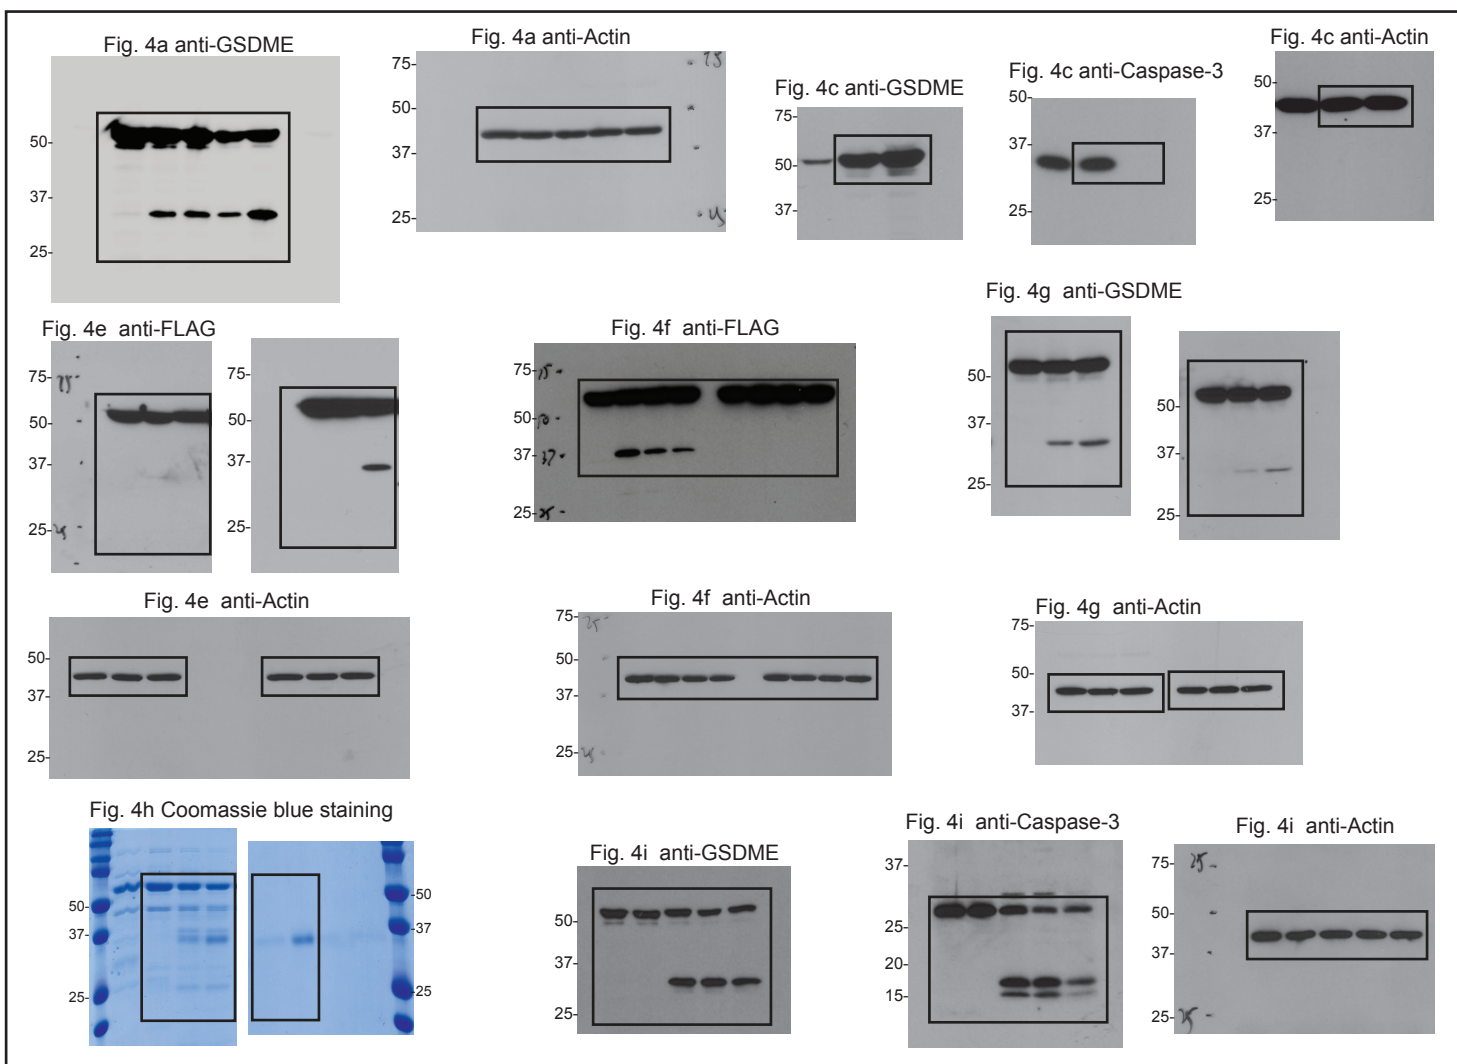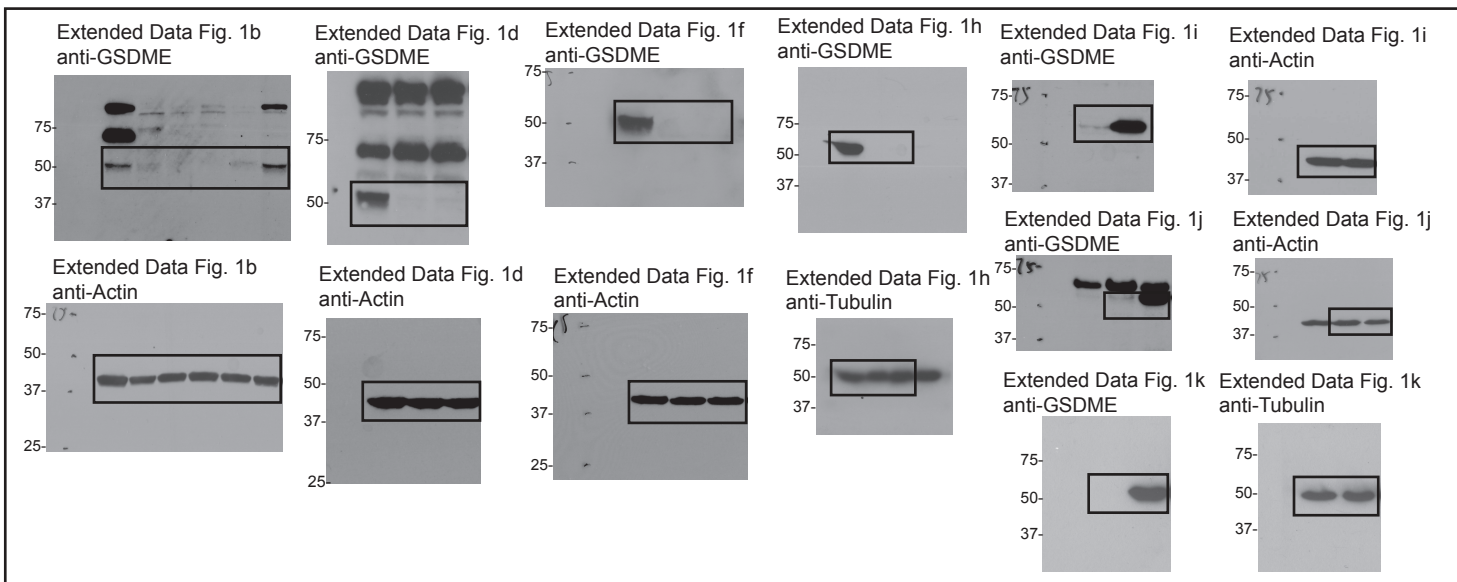

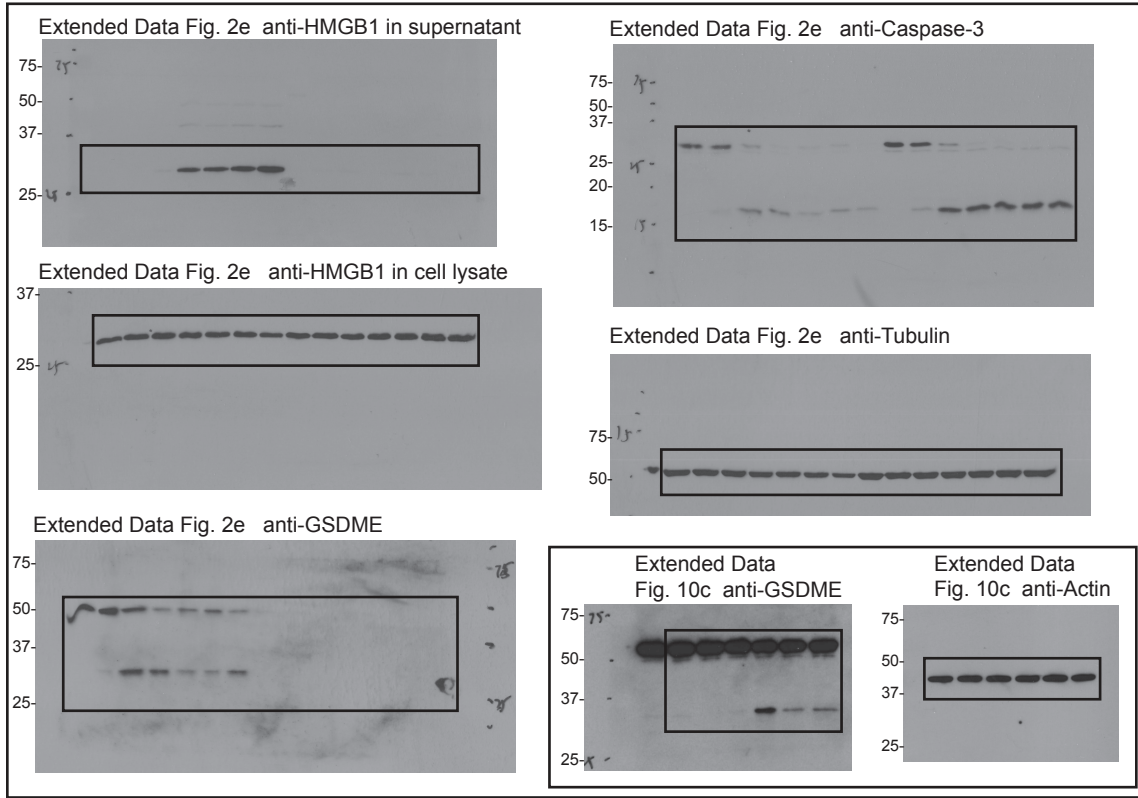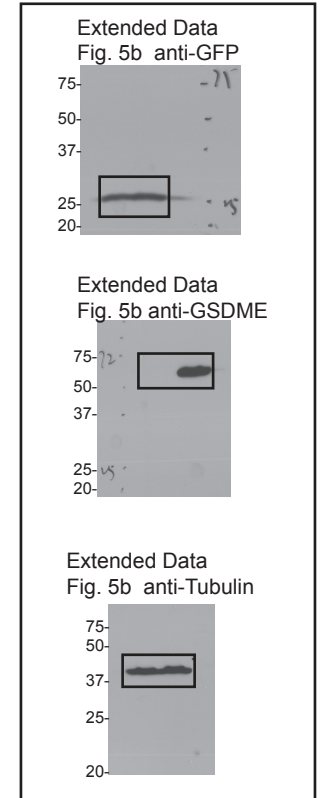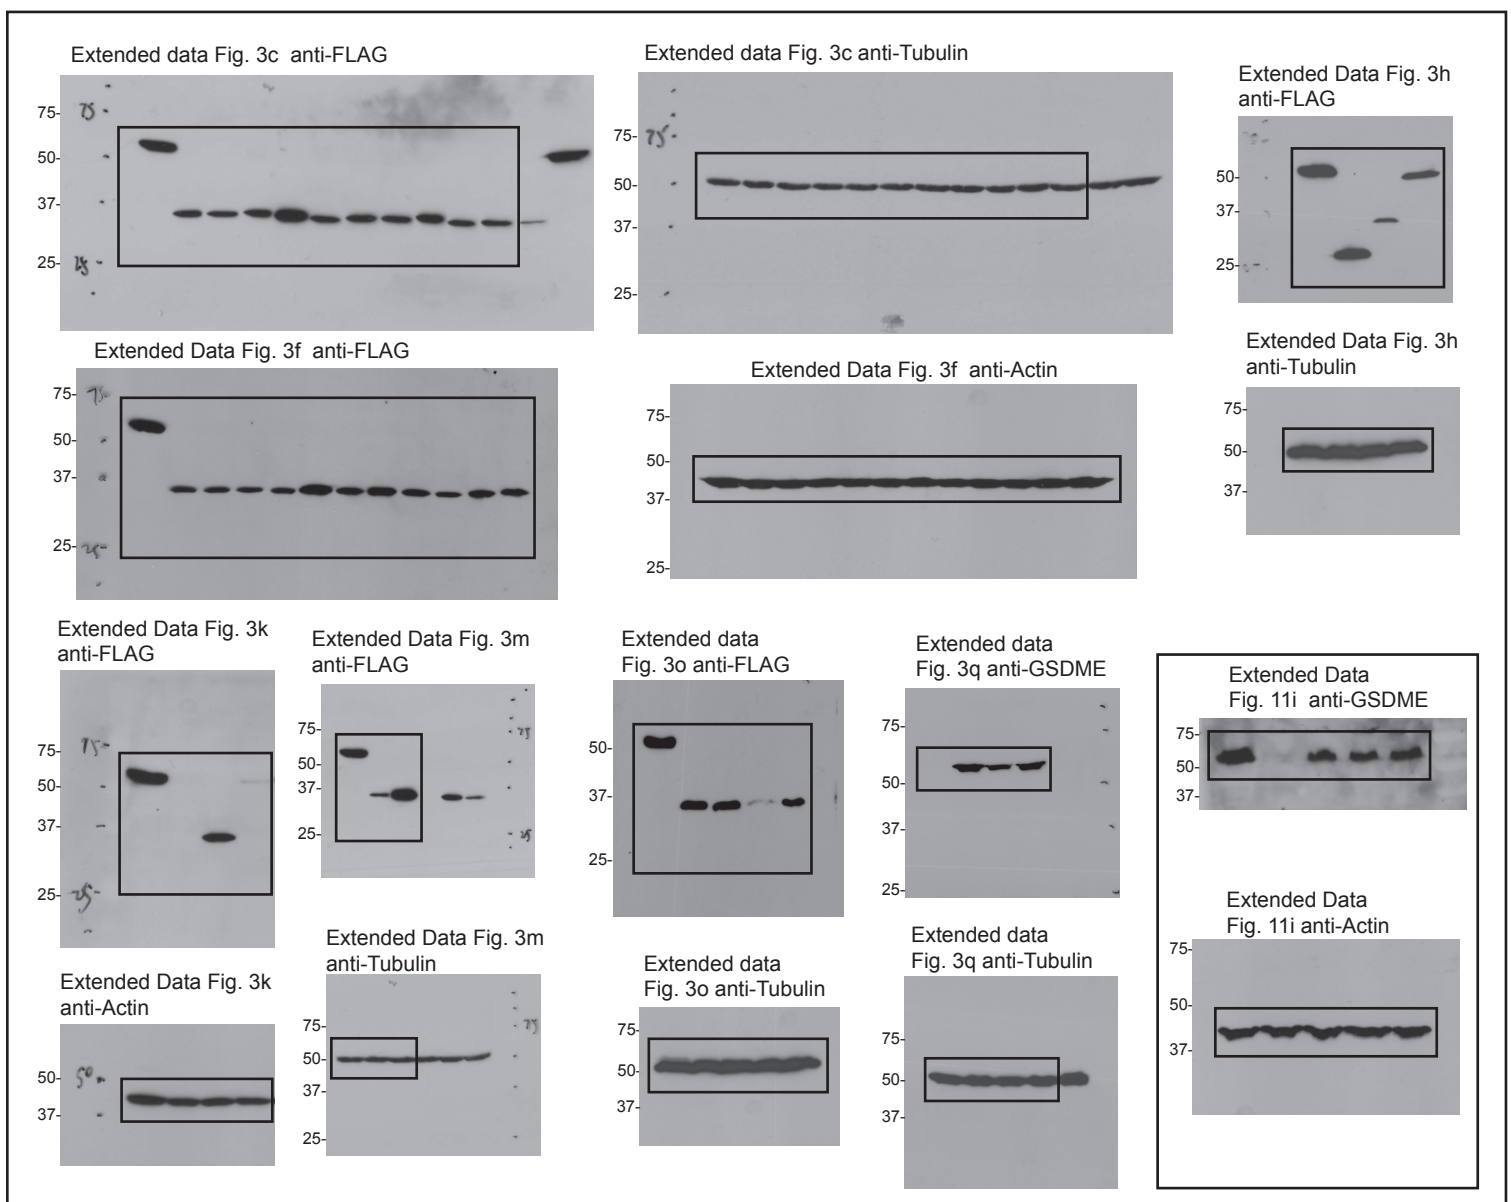

Supplement: NIHMS1549224-supplement-SupFig.pdf [file NIHMS1549224-supplement-SupFig.pdf]
